# Supplementary material for: Mechanistic Insight into Binding of Huperzine A with Human Serum Albumin: Computational and Spectroscopic Approaches
Source: MDPI journal article supplement (doi:10.3390/molecules27030797), 2022-01-25
Supplement: s1 [file s1]

## Supplementary Information

### Mechanistic Insight into Binding of Huperzine A with Human Serum Albumin: Computational and Spectroscopic Approaches

Anas Shamsi <sup>1,2,\*</sup>, Moyad Shahwan <sup>2,3</sup>, Mohd Shahnawaz Khan <sup>4</sup>, Fahad A. Alhumaydhi <sup>5</sup>, Suliman A. Alsagaby <sup>6</sup>, Waleed Al Abdulmonem <sup>7</sup>, Bekhzod Abdullaev <sup>8</sup> and Dharmendra Kumar Yadav <sup>9,\*</sup>

<sup>1</sup> Centre for Interdisciplinary Research in Basic Sciences, Jamia Millia Islamia, Jamia Nagar, New Delhi 110025, India

<sup>2</sup> Centre of Medical and Bio-Allied Health Sciences Research, Ajman University, Ajman P.O. Box 346, United Arab Emirates; moyad76@hotmail.com

<sup>3</sup> College of Pharmacy & Health sciences, Ajman University, Ajman P.O. Box 346, United Arab Emirates

<sup>4</sup> Department of Biochemistry, College of Sciences, King Saud University, Riyadh 11451, Saudi Arabia; moskhan@ksu.edu.sa

<sup>5</sup> Department of Medical Laboratories, College of Applied Medical Sciences, Qassim University, Buraydah 52571, Saudi Arabia; f.alhumaydhi@qu.edu.sa

<sup>6</sup> Department of Medical Laboratory Sciences, College of Applied Medical Sciences, Majmaah University, Majmaah 11932, Saudi Arabia; s.alsagaby@mu.edu.sa

<sup>7</sup> Department of Pathology, College of Medicine, Qassim University, Buraidah 51452, Saudi Arabia; waleedmonem@qumed.edu.sa

<sup>8</sup> Scientific Department, Akfa University, Tashkent 100022, Uzbekistan; b.abdullaev@akfauniversity.org

<sup>9</sup> College of Pharmacy, Gachon University of Medicine and Science, Hambakmoeiro, Yeonsu-gu, Incheon 21924, Korea

\* Correspondence: anas.shamsi18@gmail.com (A.S.); dharmendra30oct@gmail.com (D.K.Y.)

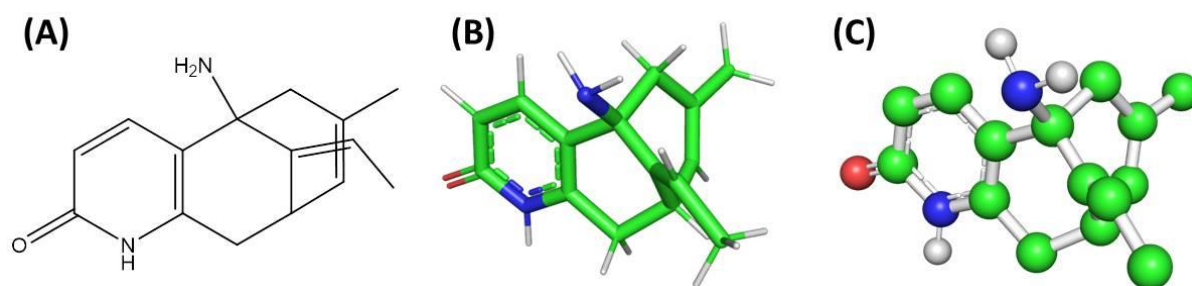

**Figure S1.** Molecular structure of Huperzine A. (A) 2D, (B) 3D stick, and (C) 3D ball and stick model of Huperzine A.

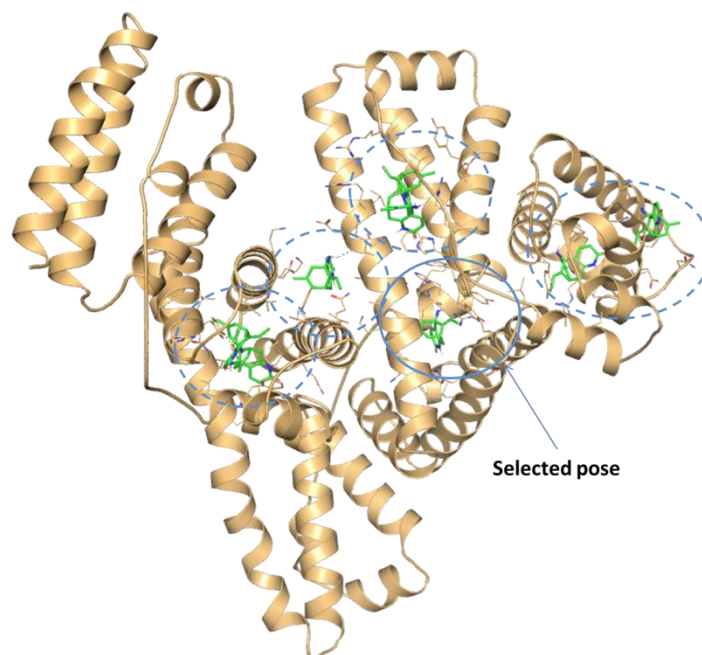

**Figure S2.** Different docked conformations of HpzaA with HSA.

Huperzine\_A\_log - Notepad

File Edit Format View Help

# This is an auto-generated log file through InstaDock employing QuickVina-W #  
 Output will be Huperzine\_A\_out.pdbqt  
 Detected 4 CPUs  
 Reading input ... done.  
 Setting up the scoring function ... done.  
 Analyzing the binding site ... done.  
 Using random seed: -1452432156  
 Performing search ... done.  
 Refining results ...  
 searching finished in 3.277 seconds  
 done.

| mode | affinity<br>(kcal/mol) | dist from best mode<br>rmsd l.b. | rmsd u.b. |
|------|------------------------|----------------------------------|-----------|
| 1    | -7.2                   | 0.000                            | 0.000     |
| 2    | -6.5                   | 22.367                           | 24.175    |
| 3    | -6.4                   | 52.114                           | 53.432    |
| 4    | -6.4                   | 52.192                           | 53.557    |
| 5    | -6.4                   | 17.159                           | 19.166    |
| 6    | -6.3                   | 18.023                           | 20.214    |
| 7    | -6.3                   | 19.911                           | 22.341    |
| 8    | -6.2                   | 13.667                           | 15.987    |
| 9    | -6.1                   | 13.894                           | 16.503    |

Writing output ... done.

**Figure S3.** Energy table of different docked conformations of HpzaA with HSA.
